# Supplementary material for: Residential fungal β-(1,3)-D-glucan exposure is associated with decreased pulmonary function in fibrotic pulmonary sarcoidosis.
Source: Research Square preprint supplement (doi:10.21203/rs.3.rs-5220174/v1), 2024-10-22
Supplement: Supplementary file 1 [file 38d306f0b98d4abd6e16cd58.docx]

**SUPPLEMENTAL MATERIAL**

*Survey questions:*

1) Do you have carpet or uncarpeted floors (*more carpet than uncarpeted, approximately half carpet/half uncarpeted,* *more uncarpeted than carpeted*)?

2) How many hours a week is your home cleaned?

3) What is the primary method of cleaning (*dusting, vacuuming, sweeping, etc*.)?

4) What type of oven is used in your residence (*gas, electric, don’t know, other*)?

5) What type of stove is used (*gas, electric, don’t know, other*)?

6) How often do you or does someone else cook (*never, a few days/month, over half the days but less than daily, daily or almost daily*)?

7) Do you have an exhaust fan over the stove/oven (or elsewhere in kitchen)?

- If **yes**, is it vented to the outside, or is air recirculated?
- How often is the exhaust fan utilized (*never, occasionally, most of the time, every time stove/oven used*)?

8) What kind of materials do you cook with (are pots, pans, and cooking utensils primarily *metal, wood, plastic*, *other*)?

9) How many days a week are smoking products (including *tobacco, vaping*, or *non-tobacco products*) smoked in the house?

10) How many times a day are smoking products (e.g., *cigarettes*/day, *cigars*/day, *vape* pens/day, *other*) used in your home?

11) How many days a week are candles, or products such as incense, Scentsy, diffusers, etc., burned in the house?

- What product do you use?

12) Do you use air conditioning at home (*yes/no*)?

- If yes, what type of air conditioning does your residence have (*central, window units, other*)?
- If window units, how many?
- If other please specify

13) How often was the air conditioning used this past July (*none, a few days a month, over half the month but not daily, almost daily*)?

14) How is your home heated (*fireplace, gas, electric, central air, radiator, space heater, other)*?

- If forced air, is there a filter?
- How often do you change the filter?

15) What is the secondary heating source (*NA*, *fireplace, gas, electric, central air, radiators, space heater, other*)?

- If forced air, is there a filter?
- How often do you change the filter?

16) What is the primary fuel-type used at residence (*gas, electric, thermal, wood, coal, pellet, other/unknown*)?

17) What is the secondary fuel-type used at residence (*gas, electric, thermal, wood, coal, pellet, other/unknown*)?

18) Do you have a garage attached to your home?

19) In **summer**, how many hours a day do you keep the windows open?

- How many days a week do you keep the windows open?

20) In **winter**, how many hours a day do you keep the windows open?

21) How many days a week do you keep the windows open?

22) Do you use an additional air purifier/air cleaner in your residence (not including your central air system)?

- If yes, is it stand-alone/portable, central, or both?
- If stand-alone/portable, is it an ionizer, filter-based (e.g. HEPA), or both?
- How often do you use this (*never, a few days a month, overhalf the month but less than daily, daily or near daily*)?

23) Are the walls painted with lead-based paint?

24) How many pets live in the house?

25) What kind of pets are they?

26) Do you have house plants?

- If yes, how many?

27) Has there been recent construction or renovation inside the house?

28) What is the rough square footage of the home?

29) Do you spend **>4 weeks** a year living at a secondary address (*yes/no*)?

- If yes, where is your secondary address?

30) Does your building or basement have water damage?

31) Do you smell mold?

32) Do you see mold?

33) On what level of the building do you live?

34) On what level of the building do you sleep?

35) Have you moved homes over the past 5 years?

- If yes, describe the date (apprx. month/year) and location of each (same/different city, same/different state)

**METHODS**

**Disease severity assessment and quantification.** We considered patients to be on non-steroidal IS if they were currently treated with or prescribed non-steroidal IS within one year of enrollment. Prescribed IS medications in our cohort included mycophenolate mofetil, methotrexate, leflunomide, azathioprine, tumor necrosis factor-α (TNF-α) inhibitors, and rituximab. The few participants receiving hydroxychloroquine monotherapy were not considered to be receiving IS, due to its decreased potency, lack of efficacy for pulmonary sarcoidosis, and lower threshold for initiation.

We used the following to calculate Wasfi severity score:

**Phlebotomy and serum cytokine processing.** Luminex xMAP technology for multiplexed quantification of 71 Human cytokines, chemokines, and growth factors was utilized, using the Luminex™ 200 system (Luminex, Austin, TX, USA) by Eve Technologies Corp. (Calgary, Alberta). Seventy-one markers were simultaneously measured using two separate kits (Eve Technologies' Human Cytokine 71-Plex Discovery Assay®): one 48-plex and one 23-plex (MilliporeSigma, Burlington, Massachusetts, USA). The assay was performed according to the manufacturer's protocol. The 48-plex consisted of sCD40L, EGF, Eotaxin, FGF-2, FLT-3 Ligand, Fractalkine, G-CSF, GM-CSF, GROα, IFN-α2, IFN-γ, IL-1α, IL-1β, IL-1RA, IL-2, IL-3, IL-4, IL-5, IL-6, IL-7, IL-8, IL-9, IL-10, IL-12(p40), IL-12(p70), IL-13, IL-15, IL-17A, IL-17E/IL-25, IL-17F, IL-18, IL-22, IL-27, IP-10, MCP-1, MCP-3, M-CSF, MDC, MIG/CXCL9, MIP-1α, MIP-1β, PDGF-AA, PDGF-AB/BB, RANTES, TGFα, TNF-α, TNF-β, and VEGF-A. The 23-plex consisted of 6CKine/CCL21, BCA-1, CTACK, ENA-78, Eotaxin-2, Eotaxin-3, I-309, IL-16, IL-20, IL-21, IL-23, IL-28A, IL-33, LIF, MCP-2, MCP-4, MIP-1δ, SCF, SDF-1α+β, TARC, TPO, TRAIL, and TSLP. Assay sensitivities range from 0.14 – 55.8 pg/mL for the 71-plex. Ten additional markers were simultaneously measured using Eve Technologies' Human Supplemental Biomarker 10-Plex Discovery Assay® (MilliporeSigma, Burlington, Massachusetts, USA) according to the manufacturer's protocol. BDNF, Cathepsin D, MPO, NCAM, PAI-1(total), PDGF-AA, PDGF-AB/BB, RANTES, sICAM-1 and sVCAM-1 assay sensitivities range from 0.22 – 200 pg/mL for the 10-plex. Individual analyte sensitivity values are available in the MilliporeSigma MILLIPLEX® MAP protocol.

**RESULTS**


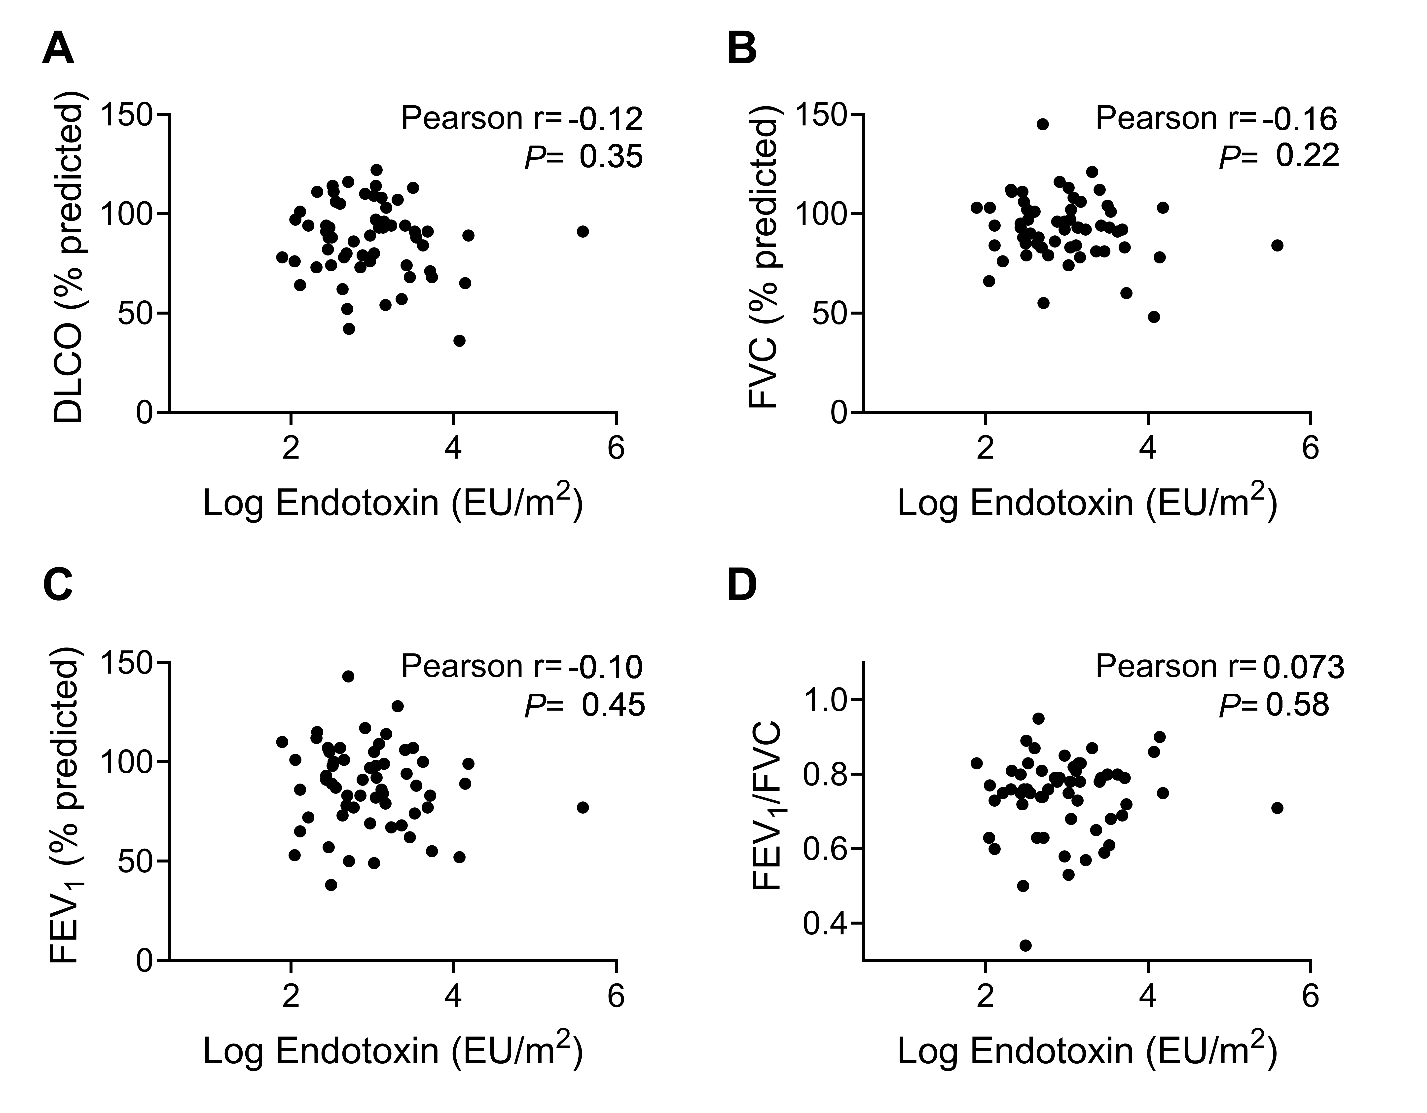

**Figure S1.** **A)** Percent predicted DLCO was not related to log-transformed endotoxin concentrations, *P*=0.35; **B)** Percent predicted FVC was not related to log-transformed endotoxin concentrations, *P*=0.22; **C)** Percent predicted FEV1 was not related to log-transformed endotoxin concentrations, *P*=0.45; **D)** FEV1/FVC was not related to log-transformed endotoxin concentrations, *P*=0.58; N=59.


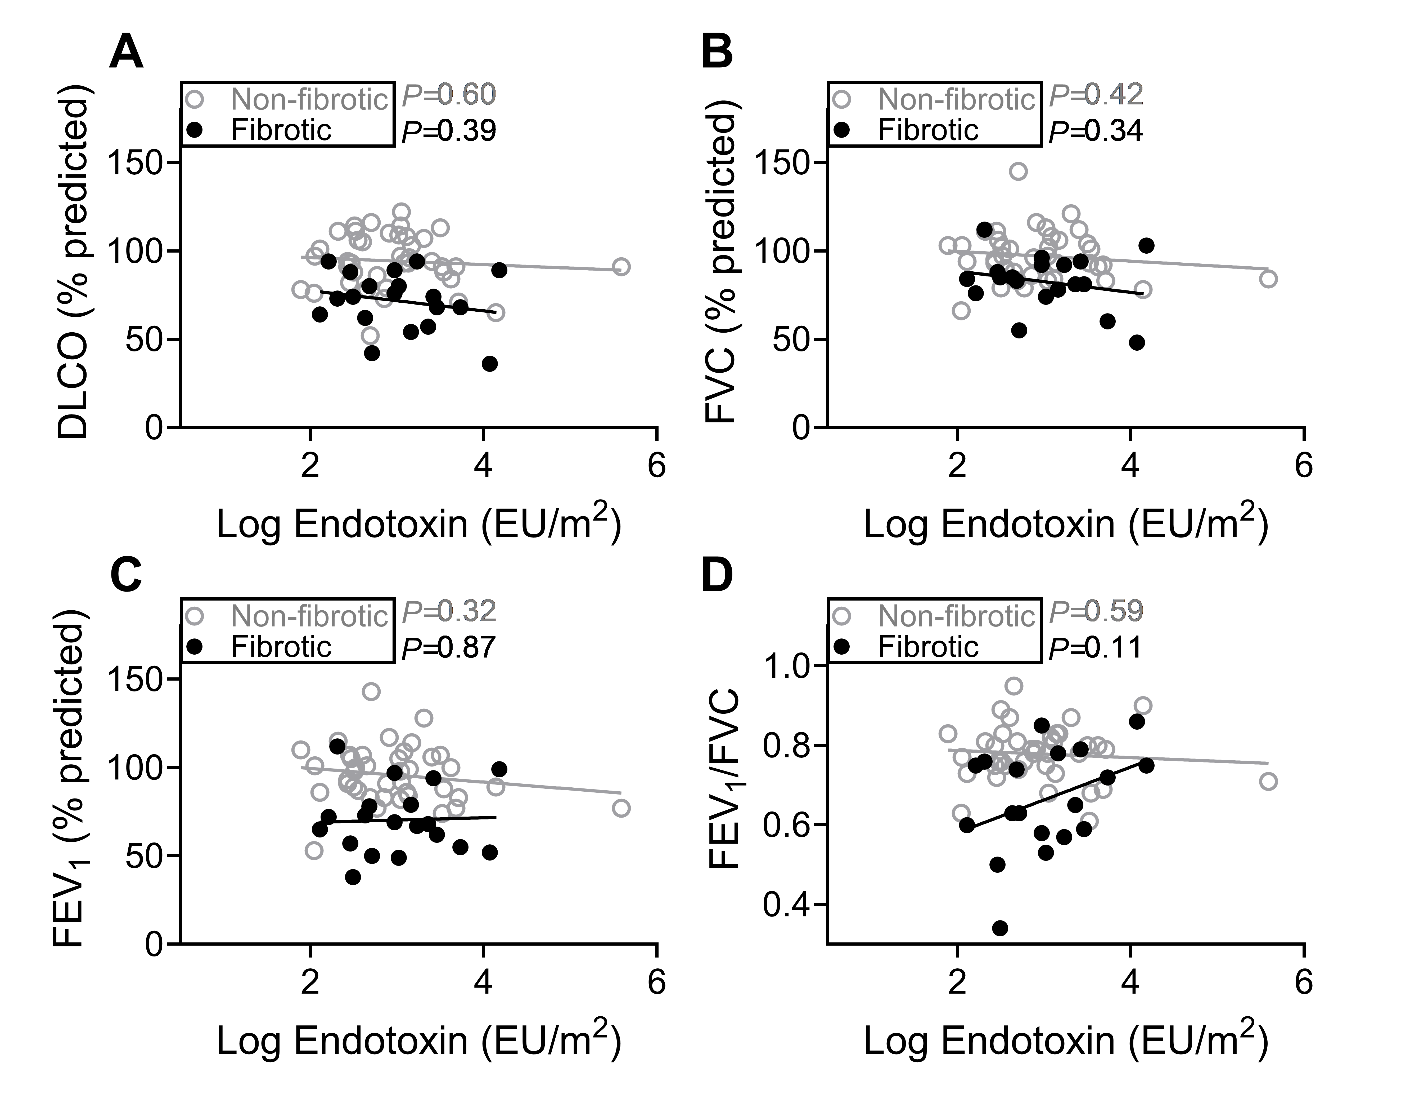

**Figure S2.** **A)** Percent predicted DLCO was not related to log-transformed endotoxin concentrations in participants with and without fibrosis (*P*=0.39; *P*=0.60, respectively); **B)** Percent predicted FVC was not related to log-transformed endotoxin concentrations in participants with and without fibrosis (*P*=0.34; *P*=0.42, respectively); **C)** Percent predicted FEV1 was not related to log-transformed endotoxin concentrations in participants with and without fibrosis (*P*=0.87; *P*=0.32, respectively); **D)** FEV1/FVC was not related to log-transformed endotoxin concentrations in participants with and without fibrosis (*P*=0.11; *P*=0.59, respectively); N=59 (non-fibrotic N=40, fibrotic: N=19).
